# Supplementary material for: Soybean fruit development and set at the node level under combined photoperiod and radiation conditions
Source: PubMed Central journal article supplement (PMC4682441; doi:10.1093/jxb/erv475), 2015-10-27
Supplement: supp_erv475_supplementary_figures_S1_S3.pdf [file supp_erv475_supplementary_figures_S1_S3.pdf]

**Supplementary Data**

**Title:** Soybean fruit development and set at the node level under combined photoperiod and radiation conditions.

**Authors:** Nico, Magalí<sup>1\*</sup>; Mantese, Anita I.<sup>2</sup>; Miralles, Daniel J.<sup>3,4,5</sup>; Kantolic, Adriana G.<sup>1</sup>

**Figure S1.** Developmental stage of the first fruit on the raceme as a function of thermal days after flowering (R1) for primary (full symbols and line) and lateral racemes (empty symbols and dotted line) at basal, central and apical nodes of mainstems of unshaded and shaded plants under control (circles), 1.5 (triangles) or 3 h extended photoperiod (squares), in Exp 1 and Exp2. Developmental scale: open flower (A), pod <1 cm long (P<sub>0</sub>), pod 1 to 2 cm long (P<sub>1</sub>) or pod >2 cm long (P<sub>2</sub>) in both experiments. In Exp2 four extra categories were included: pod 3 to 4 cm long (P<sub>3</sub>), pod 4 to 5 cm long (P<sub>4</sub>), pod >5 cm long (P<sub>5</sub>) and pod with seeds >3 mm long (BF). The panel of central nodes of unshaded plants in Exp 2 is also present on Figure 2 of the manuscript.

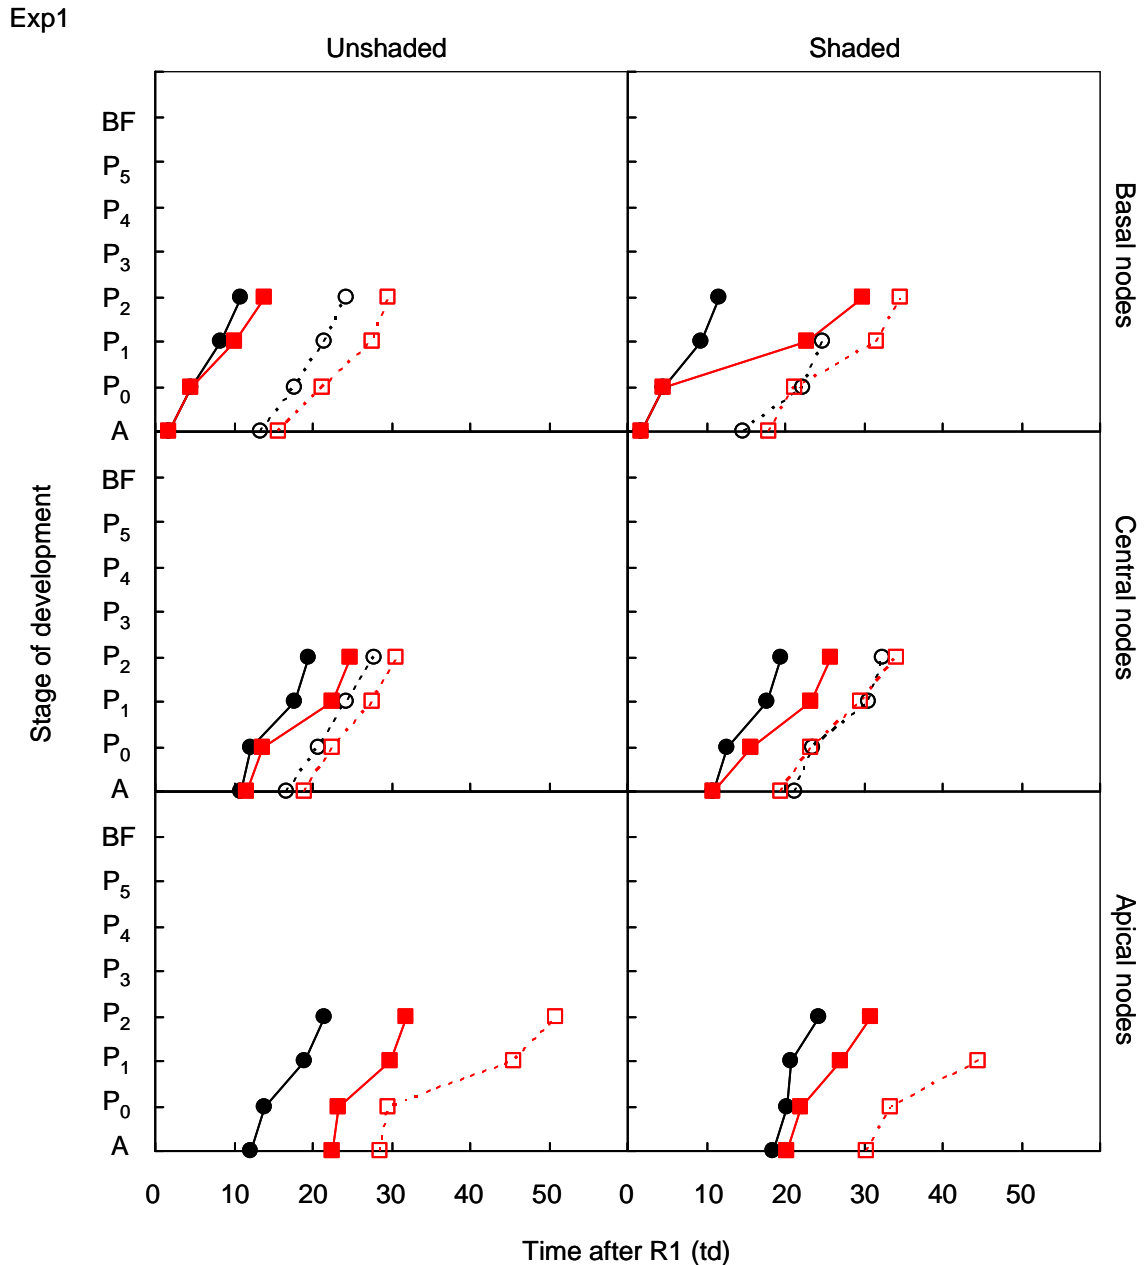

Exp2

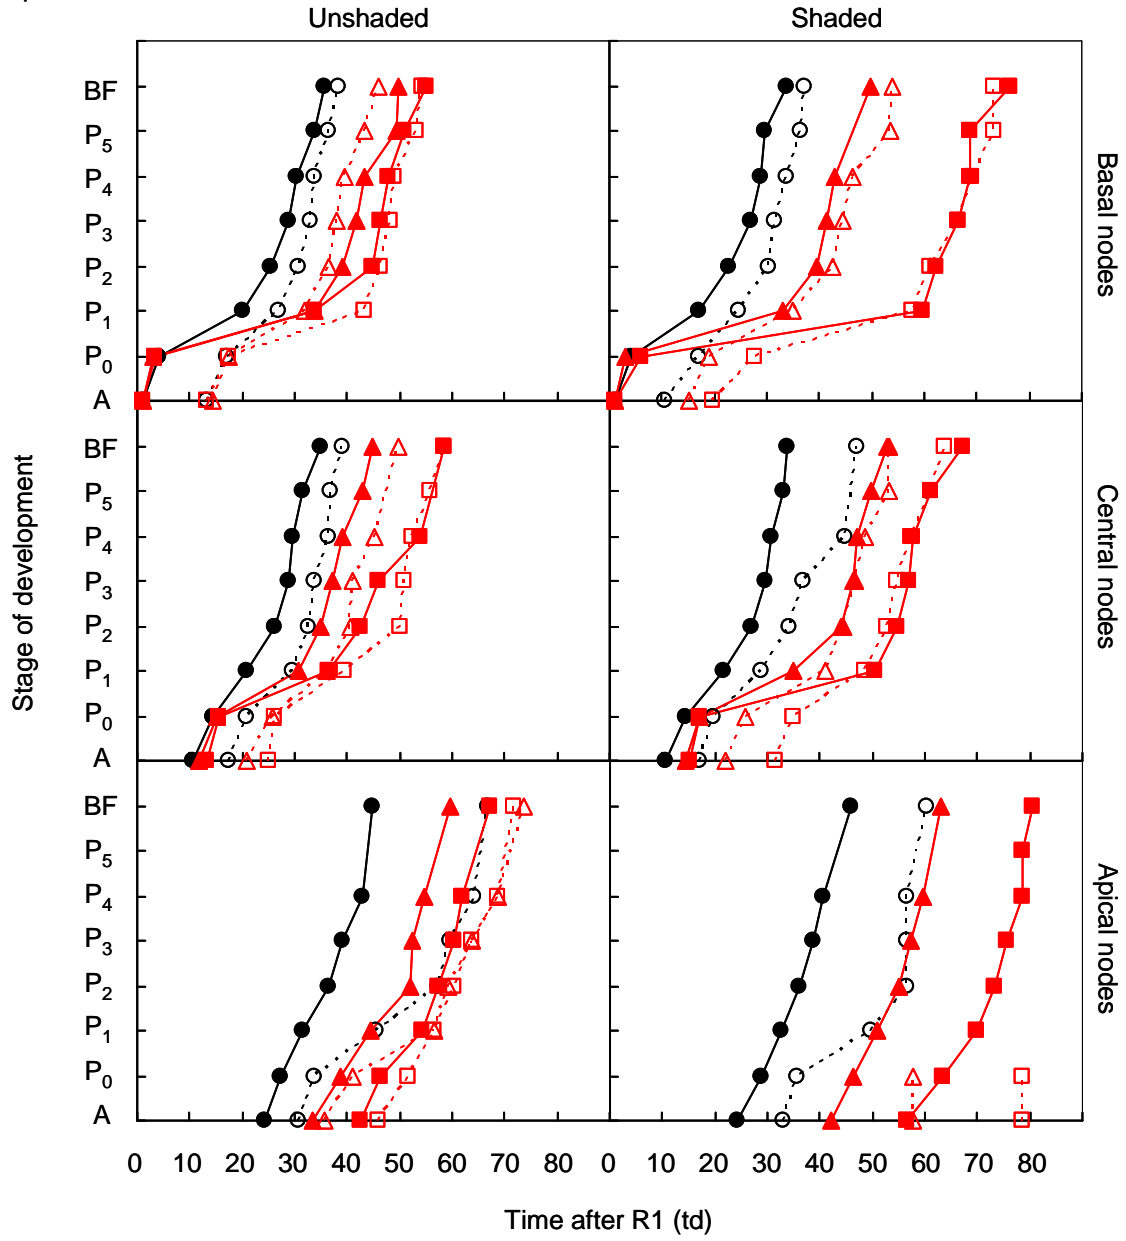

**Figure S2.** Mean number of flowers, pod set and number of pods in primary and lateral racemes as a function of pod lag phase (in thermal days) at basal (squares), central (circles) and apical nodes (triangles). The line and equation represent the fitted model for all node positions.

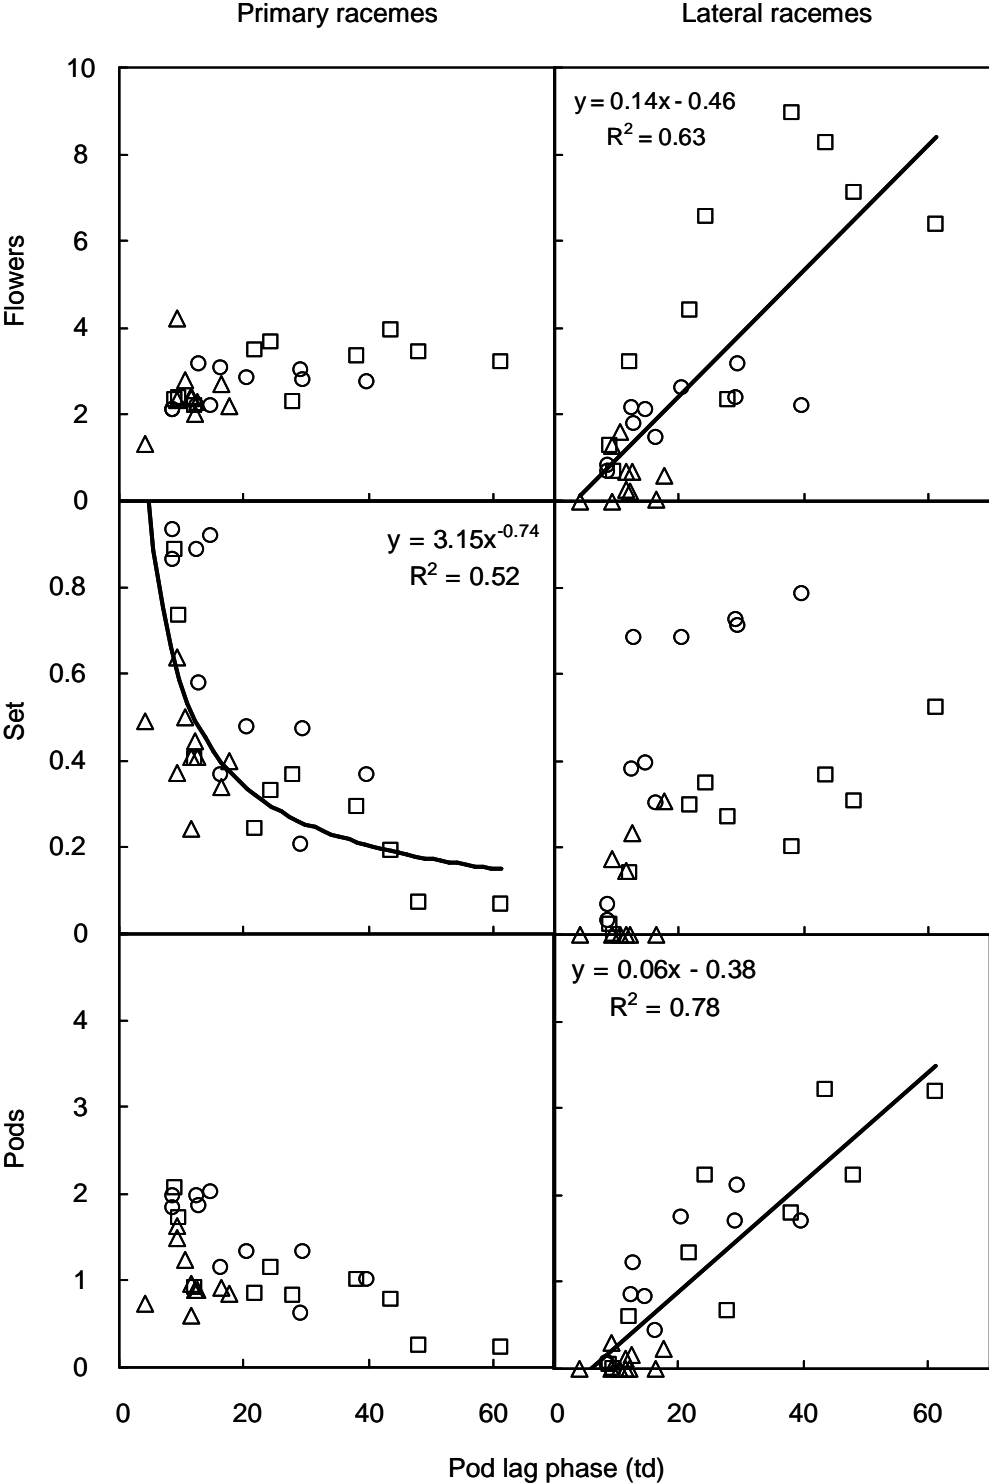

**Figure S3.** Pod lag phase (in thermal days) vs. mean photoperiod explored during the day the flower opened, for the first flower/pod of primary (full symbols and line) and lateral racemes (empty symbols and dotted line) at basal, central and apical nodes on the main stem. Equation variables are presented in the table below.

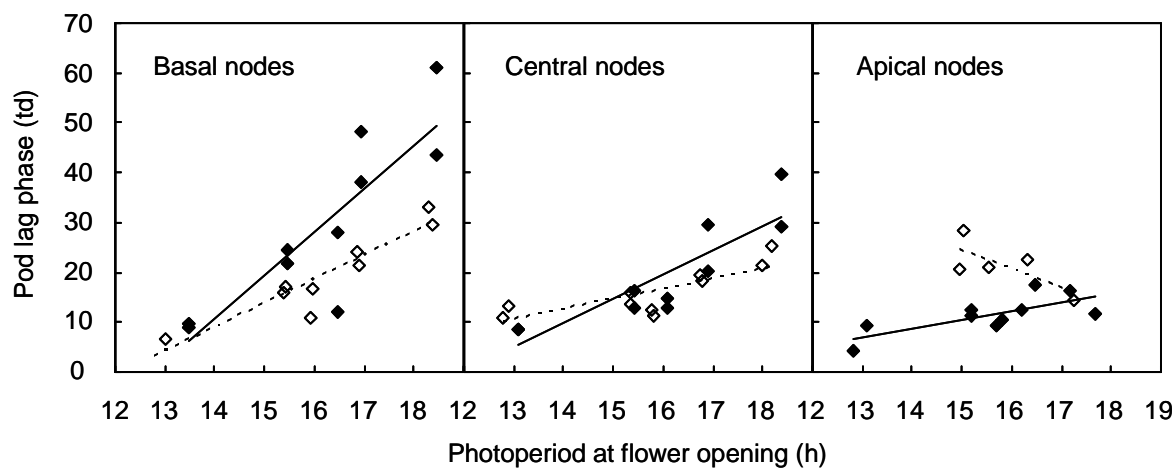

|                      | Slope | Origin | $r^2$ | p-value |
|----------------------|-------|--------|-------|---------|
| <b>Basal nodes</b>   |       |        |       |         |
| Primary racemes      | 8.68  | -110.6 | 0.73  | 0.0013  |
| Lateral racemes      | 4.62  | -56.27 | 0.85  | 0.0004  |
| <b>Central nodes</b> |       |        |       |         |
| Primary racemes      | 8.20  | -57.61 | 0.74  | 0.0015  |
| Lateral racemes      | 2.05  | -16.24 | 0.64  | 0.0054  |
| <b>Apical nodes</b>  |       |        |       |         |
| Primary racemes      | 1.83  | -17.06 | 0.56  | 0.0124  |
| Lateral racemes      | -4.03 | 84.98  | 0.62  | 0.1137  |
